# Supplementary material for: Synthesis of poly(ethylene furandicarboxylate) polyester using monomers derived from renewable resources: thermal behavior comparison with PET and PEN
Source: Royal Society of Chemistry journal article supplement (doi:10.1039/c4cp00518j), 2014-01-01
Supplement: c4cp00518j1.pdf [file c4cp00518j1.pdf]

## Supplementary Material

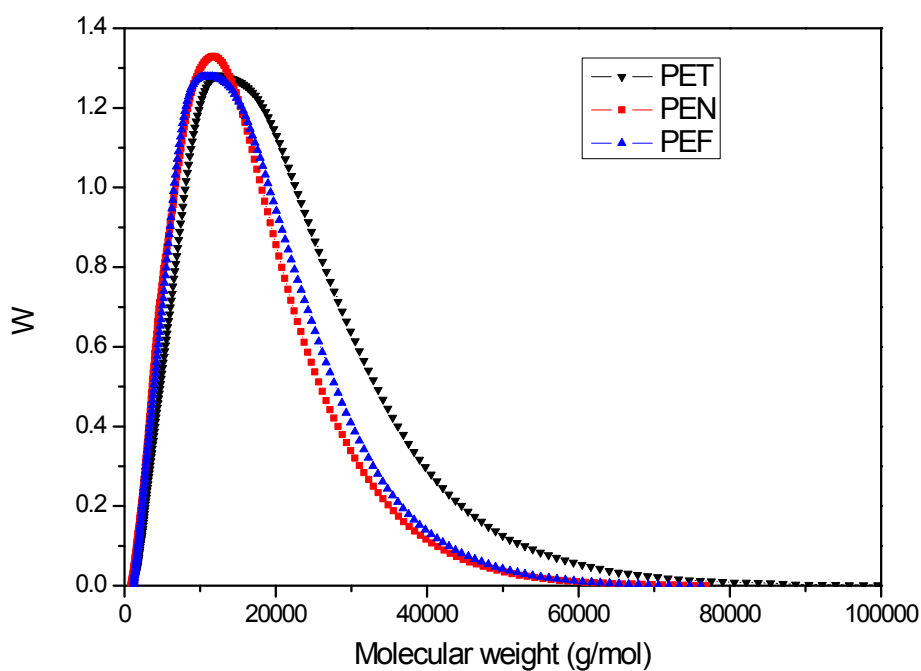

**Fig. S1.** Molecular weight distribution of PPSu measured by GPC analysis.

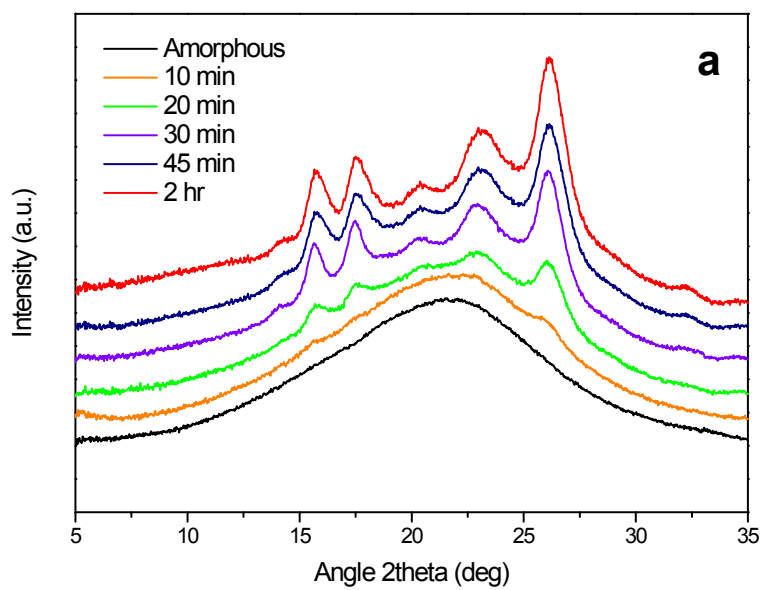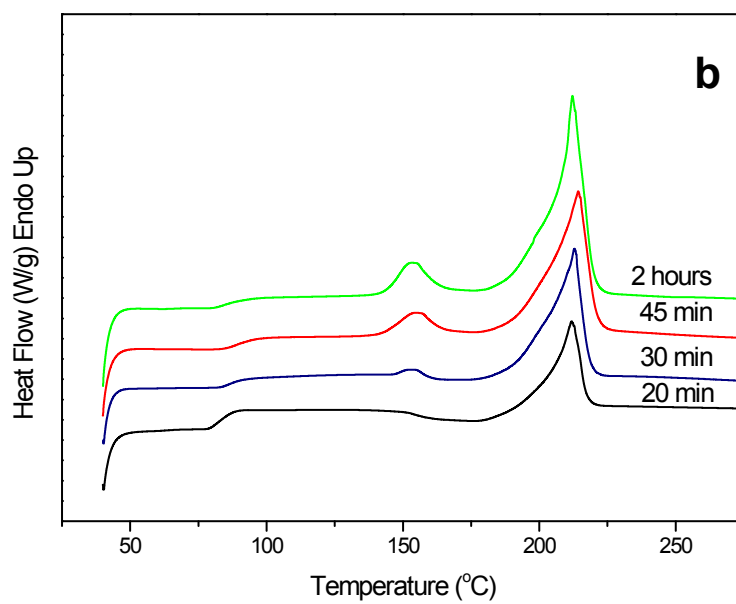

**Fig. S2.** a) WAXD and b) DSC thermograms of amorphous PEF samples heated for different times at 150°C.

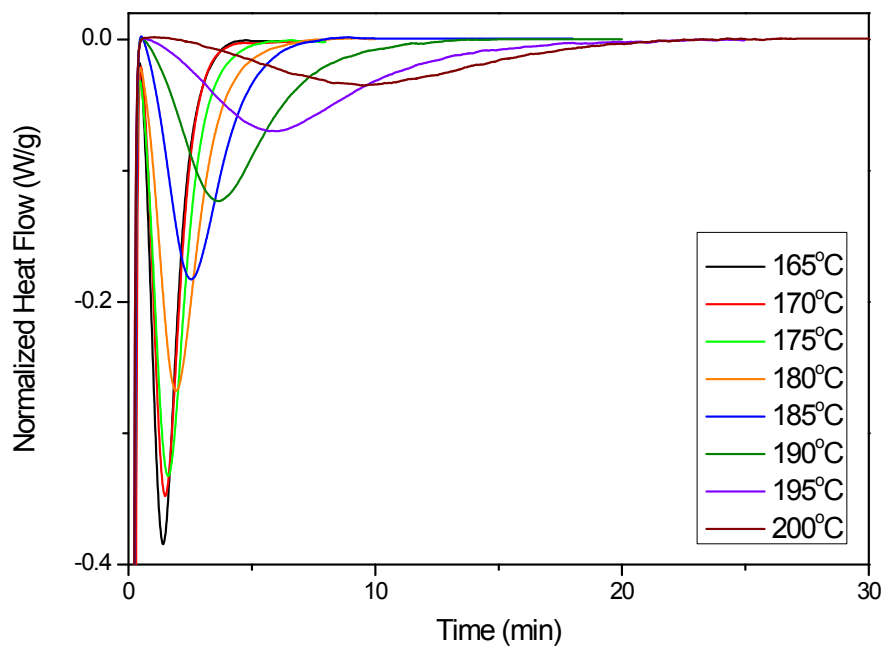

**Fig. S3.** Crystallization exothermic peak during isothermal crystallization of PEF at different temperatures

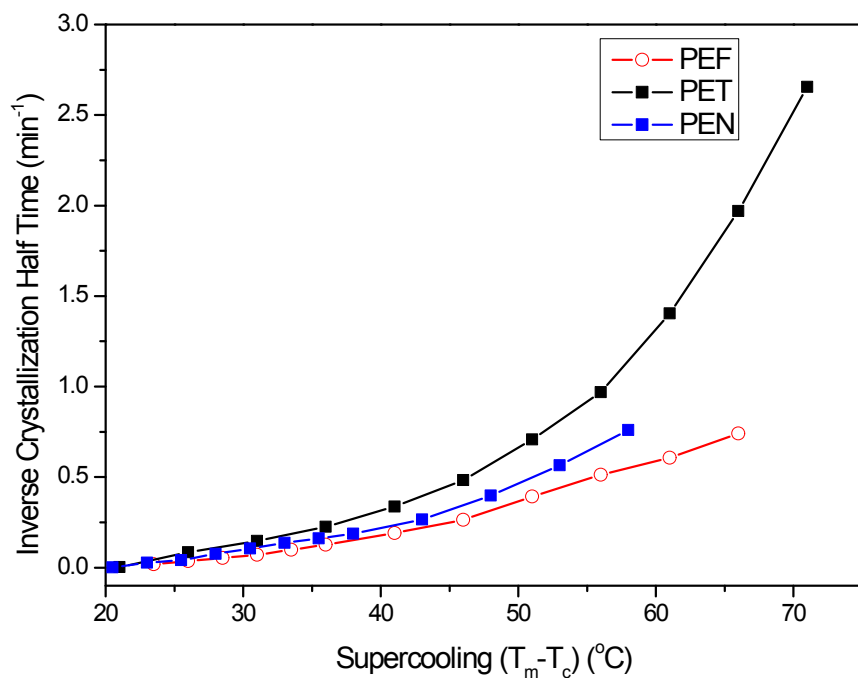

**Fig. S4.** Inverse Isothermal Crystallization Half-Time as a function of supercooling.

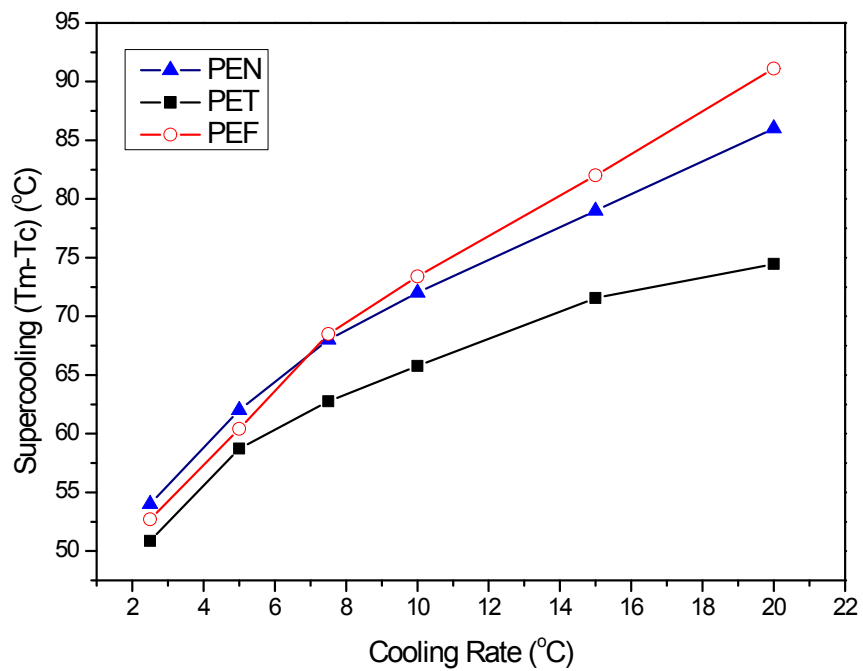

**Fig. S5.** Supercooling needed for crystallization as a function of the cooling rate.
